# Supplementary material for: Discovering adaptation-capable biological network structures using control-theoretic approaches
Source: PubMed Central journal article supplement (PMC8809615; doi:10.1371/journal.pcbi.1009769), 2022-01-21
Supplement: pcbi.1009769.s013.pdf [file pcbi.1009769.s013.pdf]

| N/W Structure | A matrix (Given $N$ node n/w $\mathbf{B} = [\beta \ \mathbf{O}_{N-1 \times 1}]^T$ )                                                                                                                                                      | Condition I                                                            | Condition II                                         | Conclusion  |
|---------------|------------------------------------------------------------------------------------------------------------------------------------------------------------------------------------------------------------------------------------------|------------------------------------------------------------------------|------------------------------------------------------|-------------|
|               | $\begin{bmatrix} a_{11}(-1) & 0 & 0 \\ a_{21}(+1) & a_{22}(-1) & 0 \\ a_{31}(+1) & a_{32}(-1) & a_{33}(-1) \end{bmatrix}$                                                                                                                | $(\ \mathcal{S}\ _0 : \mathcal{S} := \{a_{31}, a_{21}a_{32}\}) \geq 1$ | $a_{31}a_{22} - a_{21}a_{32} = 0$                    | ✓           |
|               | $\begin{bmatrix} a_{11}(-1) & 0 & 0 \\ a_{21}(-1) & a_{22}(-1) & 0 \\ a_{31}(+1) & a_{32}(-1) & a_{33}(-1) \end{bmatrix}$                                                                                                                | $(\ \mathcal{S}\ _0 := \{a_{31}, a_{21}a_{32}\}) \geq 1$               | $a_{31}a_{22} - a_{21}a_{32} = 0$                    | ✗           |
|               | $\begin{bmatrix} a_{11}(-1) & a_{12}(+1) & 0 & 0 & 0 \\ a_{21}(+1) & a_{22}(-1) & 0 & 0 & 0 \\ 0 & 0 & a_{33}(-1) & 0 & a_{35}(-1) \\ 0 & 0 & a_{43}(+1) & a_{44}(-1) & 0 \\ a_{51} & 0 & 0 & a_{54}(-1) & a_{55}(-1) \end{bmatrix}$     | $(\ \mathcal{S}\ _0 := \{a_{51}\}) \neq 0$                             | $a_{22} = 0, \text{Re}(\text{spec}(\mathbf{A})) < 0$ | ✗(Unstable) |
|               | $\begin{bmatrix} a_{11}(-1) & a_{12}(-1) & 0 & 0 & 0 \\ a_{21}(+1) & a_{22}(-1) & 0 & 0 & 0 \\ 0 & 0 & a_{33}(-1) & 0 & a_{35}(+1) \\ 0 & 0 & a_{43}(+1) & a_{44}(-1) & 0 \\ a_{51}(+1) & 0 & 0 & a_{54}(-1) & a_{55}(-1) \end{bmatrix}$ | $(\ \mathcal{S}\ _0 := \{a_{51}\}) \neq 0$                             | $a_{22} = 0, \text{Re}(\text{spec}(\mathbf{A})) < 0$ | ✓           |
|               | $\begin{bmatrix} a_{11}(-1) & a_{12}(+1) & 0 \\ a_{21}(-1) & a_{22}(-1) & 0 \\ a_{31}(+1) & 0 & a_{33}(-1) \end{bmatrix}$                                                                                                                | $(\ \mathcal{S}\ _0 : \mathcal{S} := \{a_{31}\}) = 1$                  | $a_{22} = 0, \text{Re}(\text{spec}(\mathbf{A})) < 0$ | ✓           |

Table 1: Demonstration of the algorithm.  $\|\cdot\|_0 : \mathcal{S} \rightarrow \mathbb{R}$  refers to the number of non-zero elements in the set  $\mathcal{S}$ .
